# Supplementary material for: Direct benefits explain interspecific variation in helping behaviour among cooperatively breeding birds
Source: PubMed Central journal article supplement (PMC5653647; doi:10.1038/s41467-017-01299-5), 2017-10-23
Supplement: 41467_2017_1299_MOESM1_ESM.pdf [file 41467_2017_1299_MOESM1_ESM.pdf]

**Supplementary Table 1. The effect of shortage of breeding territories (i.e. habitat saturation) on kin discrimination by helpers (the correlation between relatedness and helping) in 21 cooperatively breeding bird species.** The effects of average relatedness of helpers and the method to assess kin discrimination (whether the effect of relatedness was assessed on either the *probability* that individuals help or the *amount* of help provided) were corrected for (adjusted  $r^2$  of the model = 0.209). A graphical representation is provided in Fig. 1a.

|                                | estimate | SE    | <i>t</i> | <i>P</i> |
|--------------------------------|----------|-------|----------|----------|
| intercept                      | 0.525    | 0.210 | 2.496    | 0.023    |
| territory shortage (yes vs no) | -0.381   | 0.134 | -2.841   | 0.011    |
| average relatedness            | -0.056   | 0.579 | -0.098   | 0.923    |
| method (probability vs amount) | 0.004    | 0.145 | 0.027    | 0.979    |

**Supplementary Table 2. Output of Phylogenetic Least Square models to assess the effect of shortage of breeding territories (i.e. habitat saturation) on helping effort (log10 transformed).** Table (a) includes all 44 cooperatively breeding species (adjusted  $r^2$  of the model = 0.122), (b) includes 42 species for which helping effort was calculated by excluding non-helping subordinates (adjusted  $r^2$  of the model = 0.216), and (c) includes a subset of 31 species for which the rate of extra-pair paternity (log10 +1 transformed) was known (adjusted  $r^2$  of the model = 0.181). The effects of helper sex ratio, average group size (log10 transformed) and average relatedness of helpers to offspring were corrected for. A graphical representation is provided in Fig. 1b.

| <b>a. All 44 species</b>                                                                          | estimate | SE    | <i>t</i> | <i>P</i> |
|---------------------------------------------------------------------------------------------------|----------|-------|----------|----------|
| Intercept                                                                                         | 1.636    | 0.214 | 7.632    | <0.0001  |
| territory shortage (yes vs no)                                                                    | 0.172    | 0.062 | 2.764    | 0.009    |
| helper sex ratio                                                                                  | 0.042    | 0.150 | 0.278    | 0.782    |
| average group size                                                                                | -0.016   | 0.188 | -0.085   | 0.933    |
| average relatedness                                                                               | 0.246    | 0.234 | 1.052    | 0.299    |
| <b>b. Excluding non-helping subordinates from helping effort measures (<i>n</i> = 42 species)</b> | estimate | SE    | <i>t</i> | <i>P</i> |
| intercept                                                                                         | 1.765    | 0.219 | 8.062    | <0.0001  |
| territory shortage (yes vs no)                                                                    | 0.206    | 0.059 | 3.491    | 0.001    |
| helper sex ratio                                                                                  | -0.029   | 0.148 | -0.197   | 0.845    |
| average group size                                                                                | -0.073   | 0.181 | -0.402   | 0.690    |
| average relatedness                                                                               | 0.111    | 0.238 | 0.465    | 0.645    |
| <b>c. Species with known rates of extra-pair paternity (<i>n</i> = 31 species)</b>                | estimate | SE    | <i>t</i> | <i>P</i> |
| intercept                                                                                         | 1.445    | 0.265 | 5.447    | <0.0001  |
| territory shortage (yes vs no)                                                                    | 0.198    | 0.092 | 2.141    | 0.042    |
| helper sex ratio                                                                                  | 0.075    | 0.202 | 0.368    | 0.716    |
| log average group size                                                                            | -0.015   | 0.233 | -0.062   | 0.951    |
| average relatedness                                                                               | 0.561    | 0.318 | 1.767    | 0.089    |
| rate of extra-pair paternity                                                                      | 0.066    | 0.065 | 1.017    | 0.319    |

**Supplementary Table 3. Output of a Phylogenetic Least Square model, testing the effect of the species-level probability that subordinates inherit the territory on kin discrimination (the correlation between relatedness and helping) in 20 cooperatively breeding bird species.** The effects of average relatedness of helpers and the method to assess kin discrimination (whether the effect of relatedness was assessed on either the *probability* that individuals help or the *amount* of help provided) were corrected for (adjusted  $r^2$  of the model = 0.573). A graphical representation is provided in Fig. 2a.

|                                | estimate | SE    | <i>t</i> | <i>P</i> |
|--------------------------------|----------|-------|----------|----------|
| intercept                      | 0.618    | 0.162 | 3.812    | 0.002    |
| probability of inheritance     | -0.013   | 0.002 | -5.046   | 0.0001   |
| average relatedness            | -0.581   | 0.494 | -1.175   | 0.257    |
| method (probability vs amount) | 0.226    | 0.113 | 1.992    | 0.064    |

**Supplementary Table 4. The effect of the probability of territory inheritance on average helping effort.** (a) Output of Phylogenetic Least Square models, testing the effect of the species-level probability that subordinates inherit the territory on average helping effort (percentage relative to breeders) in 38 cooperatively breeding bird species (a graphical representation is provided in Fig. 2b). The effects of helper sex ratio, average group size (log10 transformed) and average relatedness of helpers to offspring were corrected for (adjusted  $r^2$  of the model = 0.338). Table (b) provides output from a similar model as (a) but non-helping subordinates were excluded in the calculation of helping effort (adjusted  $r^2$  of the model = 0.376). (c) In a separate analysis, the effect of the rate of extra-pair paternity (log10 +1 transformed) was also corrected for (26 species), which yielded similar results (adjusted  $r^2$  of the model = 0.333). (d) The effect of the probability that subordinates inherit the territory was also similar when only the species inhabiting saturated habitat (i.e. those with shortage of breeding territories) were included (adjusted  $r^2$  of the model = 0.401).

| <b>a. All species (<math>n = 38</math> species)</b>                                                     | estimate | SE     | $t$    | $P$     |
|---------------------------------------------------------------------------------------------------------|----------|--------|--------|---------|
| intercept                                                                                               | 58.169   | 27.153 | 2.142  | 0.04    |
| probability of inheritance                                                                              | 0.741    | 0.164  | 4.515  | <0.0001 |
| helper sex ratio                                                                                        | -4.222   | 18.496 | -0.228 | 0.821   |
| average group size                                                                                      | 2.271    | 23.824 | 0.095  | 0.925   |
| average relatedness                                                                                     | 4.708    | 30.043 | 0.157  | 0.876   |
| <b>b. Excluding non-helping subordinates from helping effort measures (<math>n = 37</math> species)</b> | estimate | SE     | $t$    | $P$     |
| Intercept                                                                                               | 70.406   | 27.651 | 2.546  | 0.016   |
| probability of inheritance                                                                              | 0.782    | 0.169  | 4.624  | <0.0001 |
| helper sex ratio                                                                                        | -14.272  | 18.829 | -0.758 | 0.454   |
| average group size                                                                                      | 3.088    | 24.176 | 0.128  | 0.899   |
| average relatedness                                                                                     | -1.845   | 30.741 | -0.060 | 0.953   |

| <b>c. Species with known rates of extra-pair paternity (<math>n = 26</math>)</b> | estimate | SE     | $t$    | $P$   |
|----------------------------------------------------------------------------------|----------|--------|--------|-------|
| Intercept                                                                        | 46.321   | 35.369 | 1.310  | 0.205 |
| probability of inheritance                                                       | 0.759    | 0.234  | 3.244  | 0.004 |
| helper sex ratio                                                                 | -14.491  | 25.688 | -0.564 | 0.579 |
| average group size                                                               | -4.528   | 30.017 | -0.151 | 0.882 |
| average relatedness                                                              | 42.035   | 45.356 | 0.927  | 0.365 |
| rate of extra-pair paternity                                                     | 10.892   | 8.415  | 1.294  | 0.210 |

  

| <b>d. Only species with territory shortage (<math>n = 22</math>)</b> | estimate | SE     | $t$    | $P$   |
|----------------------------------------------------------------------|----------|--------|--------|-------|
| Intercept                                                            | 42.373   | 34.599 | 1.225  | 0.237 |
| probability of inheritance                                           | 0.836    | 0.211  | 3.959  | 0.001 |
| helper sex ratio                                                     | -6.370   | 25.838 | -0.247 | 0.808 |
| average group size                                                   | 42.589   | 37.352 | 1.140  | 0.270 |
| average relatedness                                                  | -22.367  | 47.038 | -0.476 | 0.640 |

**Supplementary Table 5. Output of Phylogenetic Least Square that were repeated after conservative exclusion of ambiguous data.** The results are the same as for the analyses including all data, for analyses of (a) the effect of the probability that subordinates inherit the territory on kin discrimination ( $n = 19$  species; adjusted  $r^2$  of the model = 0.595;  $\lambda < 0.001$ ), (b) the effect of shortage of breeding territories on helping effort (log10 transformed;  $n = 40$  species; adjusted  $r^2$  of the model = 0.114), and the effect of the probability that subordinates inherit the territory on (c) helping effort ( $n = 31$  species; adjusted  $r^2$  of the model = 0.356). The comparable analyses including all data are provided in Supplementary Tables 1, 3 and 4a, respectively.

| <b>a. Kin discrimination</b>    | estimate | SE     | <i>t</i> | <i>P</i> |
|---------------------------------|----------|--------|----------|----------|
| intercept                       | 0.547    | 0.167  | 3.283    | 0.005    |
| probability of inheritance      | -0.012   | 0.002  | -5.125   | 0.0001   |
| average relatedness             | -0.420   | 0.497  | -0.846   | 0.411    |
| method (probability vs. amount) | 0.235    | 0.111  | 2.121    | 0.051    |
| <b>b. Helping effort</b>        | estimate | SE     | <i>t</i> | <i>P</i> |
| Intercept                       | 1.673    | 0.247  | 6.780    | <0.0001  |
| territory shortage (yes vs no)  | 0.169    | 0.064  | 2.642    | 0.012    |
| helper sex ratio                | 0.043    | 0.173  | 0.248    | 0.806    |
| average group size              | -0.091   | 0.200  | -0.456   | 0.651    |
| average relatedness             | 0.242    | 0.270  | 0.894    | 0.378    |
| <b>c. Helping effort</b>        | estimate | SE     | <i>t</i> | <i>P</i> |
| intercept                       | 59.627   | 29.312 | 2.034    | 0.052    |
| probability of inheritance      | 0.779    | 0.174  | 4.478    | 0.0001   |
| helper sex ratio                | 0.389    | 21.547 | 0.018    | 0.986    |
| average group size              | -2.692   | 25.503 | -0.106   | 0.917    |
| average relatedness             | -3.344   | 31.899 | -0.105   | 0.917    |
