# Supplementary material for: Direct benefits explain interspecific variation in helping behaviour among cooperatively breeding birds
Source: PubMed Central journal article supplement (PMC5653647; doi:10.1038/s41467-017-01299-5), 2017-10-23
Supplement: 41467_2017_1299_MOESM3_ESM.pdf [file 41467_2017_1299_MOESM3_ESM.pdf]

**File Name:** Supplementary Data 1.

**Description:** A table containing all data used for the comparative study.
